# Supplementary material for: Size fractionation of graphene oxide sheets by the polar solvent-selective natural deposition method
Source: Royal Society of Chemistry journal article supplement (doi:10.1039/c4ra08516g), 2014-11-19
Supplement: c4ra08516g1.pdf [file c4ra08516g1.pdf]

Supporting information

# Size fractionation of graphene oxide sheets by the polar solvent-selective natural deposition method

Wenjun Zhang,<sup>\*a</sup> Xuefeng Zou,<sup>a</sup> Huanrong Li,<sup>a</sup> Jingju Hou,<sup>a</sup> Jinfeng Zhao,<sup>a</sup> Jianwen Lan,<sup>a</sup> Baolong Feng<sup>a</sup> and Shuting Liu<sup>a</sup>

<sup>a</sup> *School of Chemical Engineering, Hebei University of Technology, Tianjin 300130, China*

**\*Corresponding author.**

**Fax.:** +022 6020 4294.

**E-mail address:** [wjzhang@hebut.edu.cn](mailto:wjzhang@hebut.edu.cn)

**Fig. S1** SEM images of GOSs1 (b), GOSs2 (c), GOSs3 (d), and GOSs4 (e).

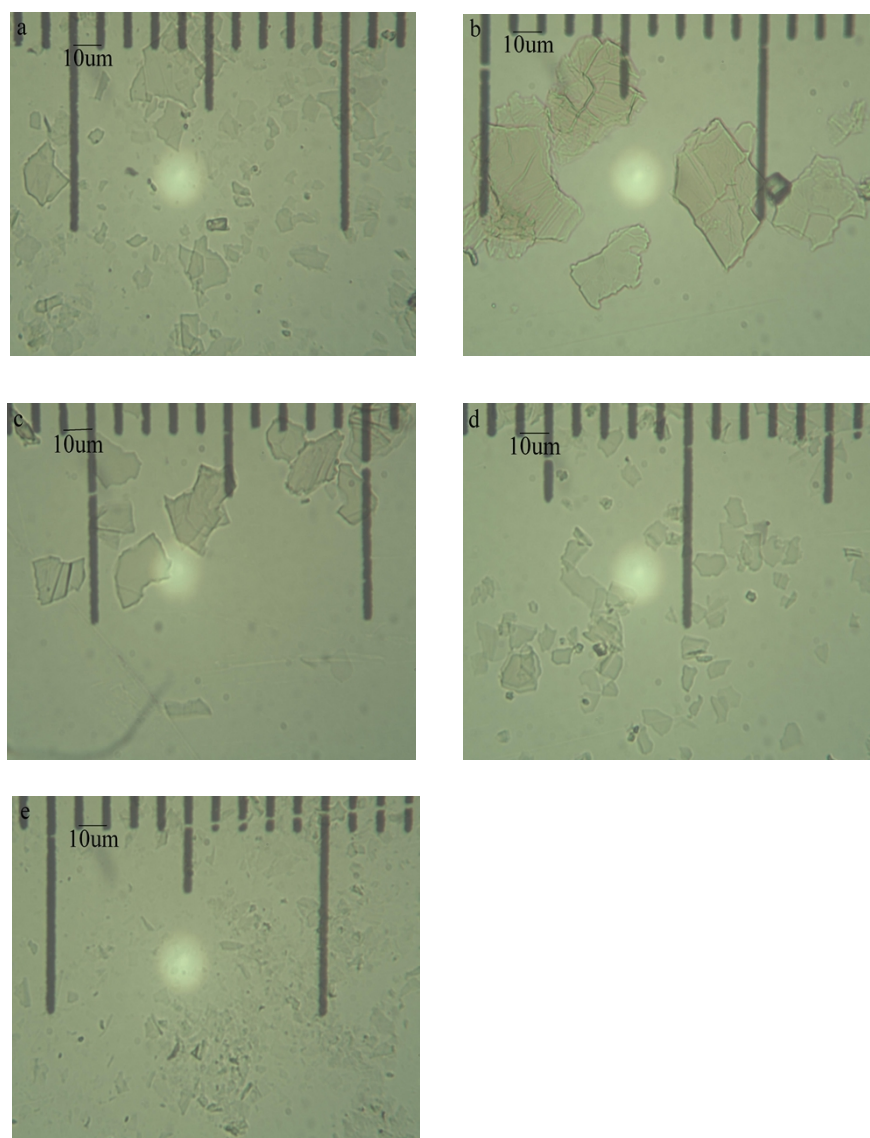

**Fig. S2** Optical images of cGO (a), GOSs1 (b), GOSs2 (c), GOSs3 (d) and GOSs4 (e).

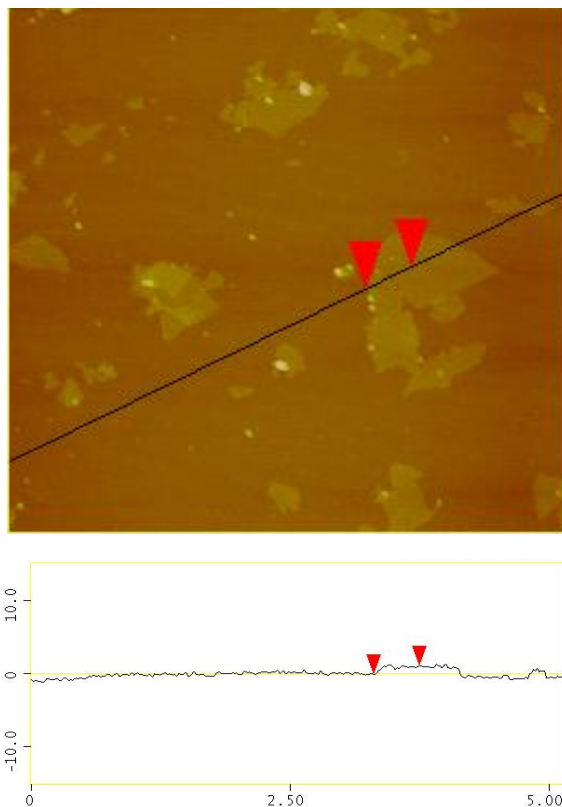

**Figure S3** AFM image of GOSs. The thick of a GOSs sheet is about 1.144nm, indicating a monolayer structure.

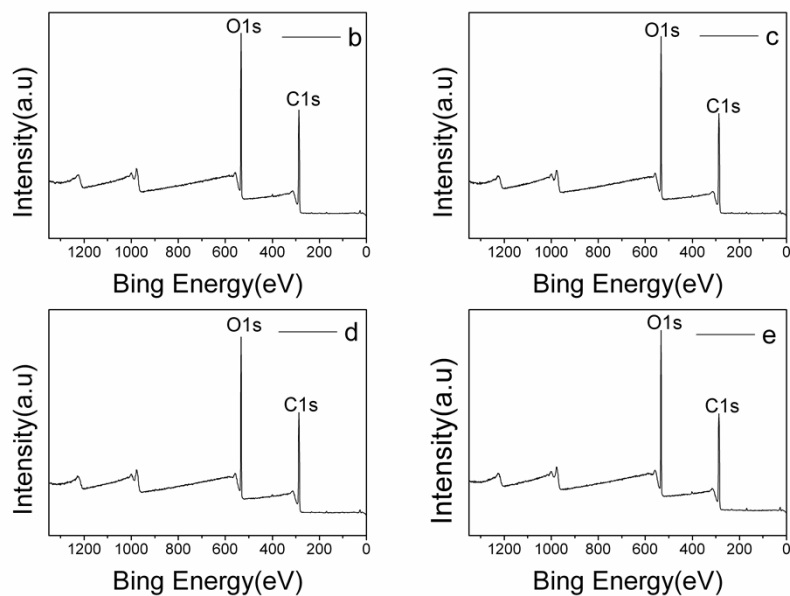

**Fig. S4** XPS of GOSs1 (b), GOSs2 (c), GOSs3 (d) and GOSs4 (e).
